# Supplementary material
Source: PubMed Central journal article supplement (PMC8397782)
Supplement: 41396_2021_956_MOESM1_ESM.pdf [file 41396_2021_956_MOESM1_ESM.pdf]

Table S1. Bacterial Strains

| Strain                       | Relevant characteristics                                                                            | Reference or source |
|------------------------------|-----------------------------------------------------------------------------------------------------|---------------------|
| <i>P. gingivalis</i>         |                                                                                                     |                     |
| 33277                        | Type strain                                                                                         | ATCC                |
| 381                          | Common laboratory strain                                                                            | ATCC                |
| W83                          | Common laboratory strain                                                                            | ATCC                |
| A7A1-28                      | Common laboratory strain                                                                            | [1]                 |
| MP4-504                      | Low passage clinical isolate                                                                        | [2]                 |
| $\Delta$ fimA                | Isogenic mutant of 33277 lacking major fimbrial protein FimA                                        | [3]                 |
| $\Delta$ mfa1                | Isogenic mutant of 33277 lacking minor fimbrial protein Mfa1                                        | [4]                 |
| $\Delta$ php1 $\Delta$ ltp1  | Isogenic mutant of 33277 lacking the two major tyrosine phosphatases, Php1 and Ltp1                 | [5]                 |
| $\Delta$ serB                | Isogenic mutant of 33277 lacking the serine phosphatase SerB                                        | [6]                 |
| $\Delta$ porK                | Isogenic mutant of 33277 lacking PorK and thus the T9SS is non-functional                           | Lab collection      |
| $\Delta$ rgpA/B              | Isogenic mutant of 33277 lacking the arginine gingipains RgpA and RgpB                              | [7]                 |
| $\Delta$ kgp                 | Isogenic mutant of 33277 lacking the lysine gingipain Kgp                                           | [7]                 |
| $\Delta$ kgp $\Delta$ rgpA/B | Isogenic mutant of 33277 lacking the lysine gingipain Kgp and the arginine gingipains RgpA and RgpB | [7]                 |
|                              |                                                                                                     |                     |
| <i>S. gordonii</i>           |                                                                                                     |                     |
| DL1                          | Common laboratory strain                                                                            | Lab collection      |
| $\Delta$ spxB                | Isogenic mutant of DL1 lacking pyruvate oxidase and deficient in production of hydrogen peroxide    | [8]                 |
| C $\Delta$ spxB              | $\Delta$ spxB complemented with the wild type <i>spxB</i> allele in trans                           | [8]                 |
| $\Delta$ sspA/B              | Isogenic mutant of DL1 lacking the SspA/B adhesins                                                  | [8]                 |
| $\Delta$ cbe                 | Isogenic mutant of DL1 lacking chorismite binding enzyme and unable to produce pABA                 | [9]                 |
|                              |                                                                                                     |                     |
| <i>S. mutans</i> KPSK2       | Common laboratory strain                                                                            | Lab collection      |
| <i>S. oralis</i> 10557       | Common laboratory strain                                                                            | Lab collection      |
| <i>S. sanguinis</i> 10556    | Common laboratory strain                                                                            | Lab collection      |
| <i>S. constellatus</i> 27823 | Common laboratory strain                                                                            | ATCC                |
| <i>T. denticola</i> 35405    | Type strain                                                                                         | ATCC                |
| <i>F. nucleatum</i> 25586    | Type strain                                                                                         | ATCC                |
| <i>F. alocis</i> 35896       | Type strain                                                                                         | ATCC                |

Table S2. Eukaryotic Cells

| Cell name  | Relevant characteristics                          | Reference or source |
|------------|---------------------------------------------------|---------------------|
| TIGK       | Telomerase immortalized gingival epithelial cells | [10]                |
| OKF6/TERT2 | Telomerase immortalized oral mucosa cells         | [11]                |
| SCC9       | Derived from tongue squamous cell carcinoma       | ATCC                |
| ESCC9706   | Derived from esophageal squamous cell carcinoma   | [12]                |

Table S3. Antibodies and Reagents

| Item                                                                                                                                    | Supplier                    |
|-----------------------------------------------------------------------------------------------------------------------------------------|-----------------------------|
| OLFM4, Activated Notch1, and GAPDH antibodies                                                                                           | Abcam, Cambridge, MA        |
| Phalloidin- Texas Red, Alexa Fluor 488, DAPI, and OLFM4 ELISA                                                                           | ThermoFisher, Waltham, MA   |
| OLFM4, Notch1, Notch2, Notch3, Notch4, Jag1, Jag2, DLL1, DLL3, DLL4, ZEB2, $\beta$ -catenin, ADAM10, ADAM17, and NLK trilencer-27 siRNA | Origene, Rockville, MD      |
| TLCK, FH535, LY-374973, and L-BAPNA                                                                                                     | Sigma-Aldrich, St Louis. MO |
| TAPI-2                                                                                                                                  | Tocris, Minneapolis, MN     |

## References

1. Chen PB, Neiders ME, Millar SJ, Reynolds HS, Zambon JJ. Effect of immunization on experimental *Bacteroides gingivalis* infection in a murine model. *Infect Immun* 1987; **55**: 2534-2537.
2. Lamont RJ, Chan A, Belton CM, Izutsu KT, Vasel D, Weinberg A. *Porphyromonas gingivalis* invasion of gingival epithelial cells. *Infect Immun* 1995; **63**: 3878-3885.
3. Sztukowska MN, Ojo A, Ahmed S, Carenbauer AL, Wang Q, Shumway B, et al. *Porphyromonas gingivalis* initiates a mesenchymal-like transition through Zeb1 in gingival epithelial cells. *Cell Microbiol* 2016; **18**: 844-858.
4. Park Y, Simionato MR, Sekiya K, Murakami Y, James D, Chen W, et al. Short fimbriae of *Porphyromonas gingivalis* and their role in coadhesion with *Streptococcus gordonii*. *Infect Immun* 2005; **73**: 3983-3989.
5. Jung YJ, Miller DP, Perpich JD, Fitzsimonds ZR, Shen D, Ohshima J, et al. *Porphyromonas gingivalis* tyrosine phosphatase Php1 promotes community development and pathogenicity. *mBio* 2019; **10**.
6. Tribble GD, Mao S, James CE, Lamont RJ. A *Porphyromonas gingivalis* haloacid dehalogenase family phosphatase interacts with human phosphoproteins and is important for invasion. *Proc Natl Acad Sci U S A* 2006; **103**: 11027-11032.
7. Lee JY, Miller DP, Wu L, Casella CR, Hasegawa Y, Lamont RJ. Maturation of the Mfa1 fimbriae in the oral pathogen *Porphyromonas gingivalis*. *Front Cell Infect Microbiol* 2018; **8**: 137.
8. Kuboniwa M, Tribble GD, James CE, Kilic AO, Tao L, Herzberg MC, et al. *Streptococcus gordonii* utilizes several distinct gene functions to recruit *Porphyromonas gingivalis* into a mixed community. *Mol Microbiol* 2006; **60**: 121-139.
9. Kuboniwa M, Houser JR, Hendrickson EL, Wang Q, Alghamdi SA, Sakanaka A, et al. Metabolic crosstalk regulates *Porphyromonas gingivalis* colonization and virulence during oral polymicrobial infection. *Nat Microbiol* 2017; **2**: 1493-1499.
10. Moffatt-Jauregui CE, Robinson B, de Moya AV, Brockman RD, Roman AV, Cash MN, et al. Establishment and characterization of a telomerase immortalized human gingival epithelial cell line. *J Periodontal Res* 2013; **48**: 713-721.
11. Dickson MA, Hahn WC, Ino Y, Ronfard V, Wu JY, Weinberg RA, et al. Human keratinocytes that express htTert and also bypass a p16(ink4a)-enforced mechanism that limits life span become immortal yet retain normal growth and differentiation characteristics. *Mol Cell Biol* 2000; **20**: 1436-1447.
12. Han Y, Wei F, Xu X, Cai Y, Chen B, Wang J, et al. [establishment and comparative genomic hybridization analysis of human esophageal carcinomas cell line ec9706]. *Zhonghua Yi Xue Yi Chuan Xue Za Zhi* 2002; **19**: 455-457.

**A**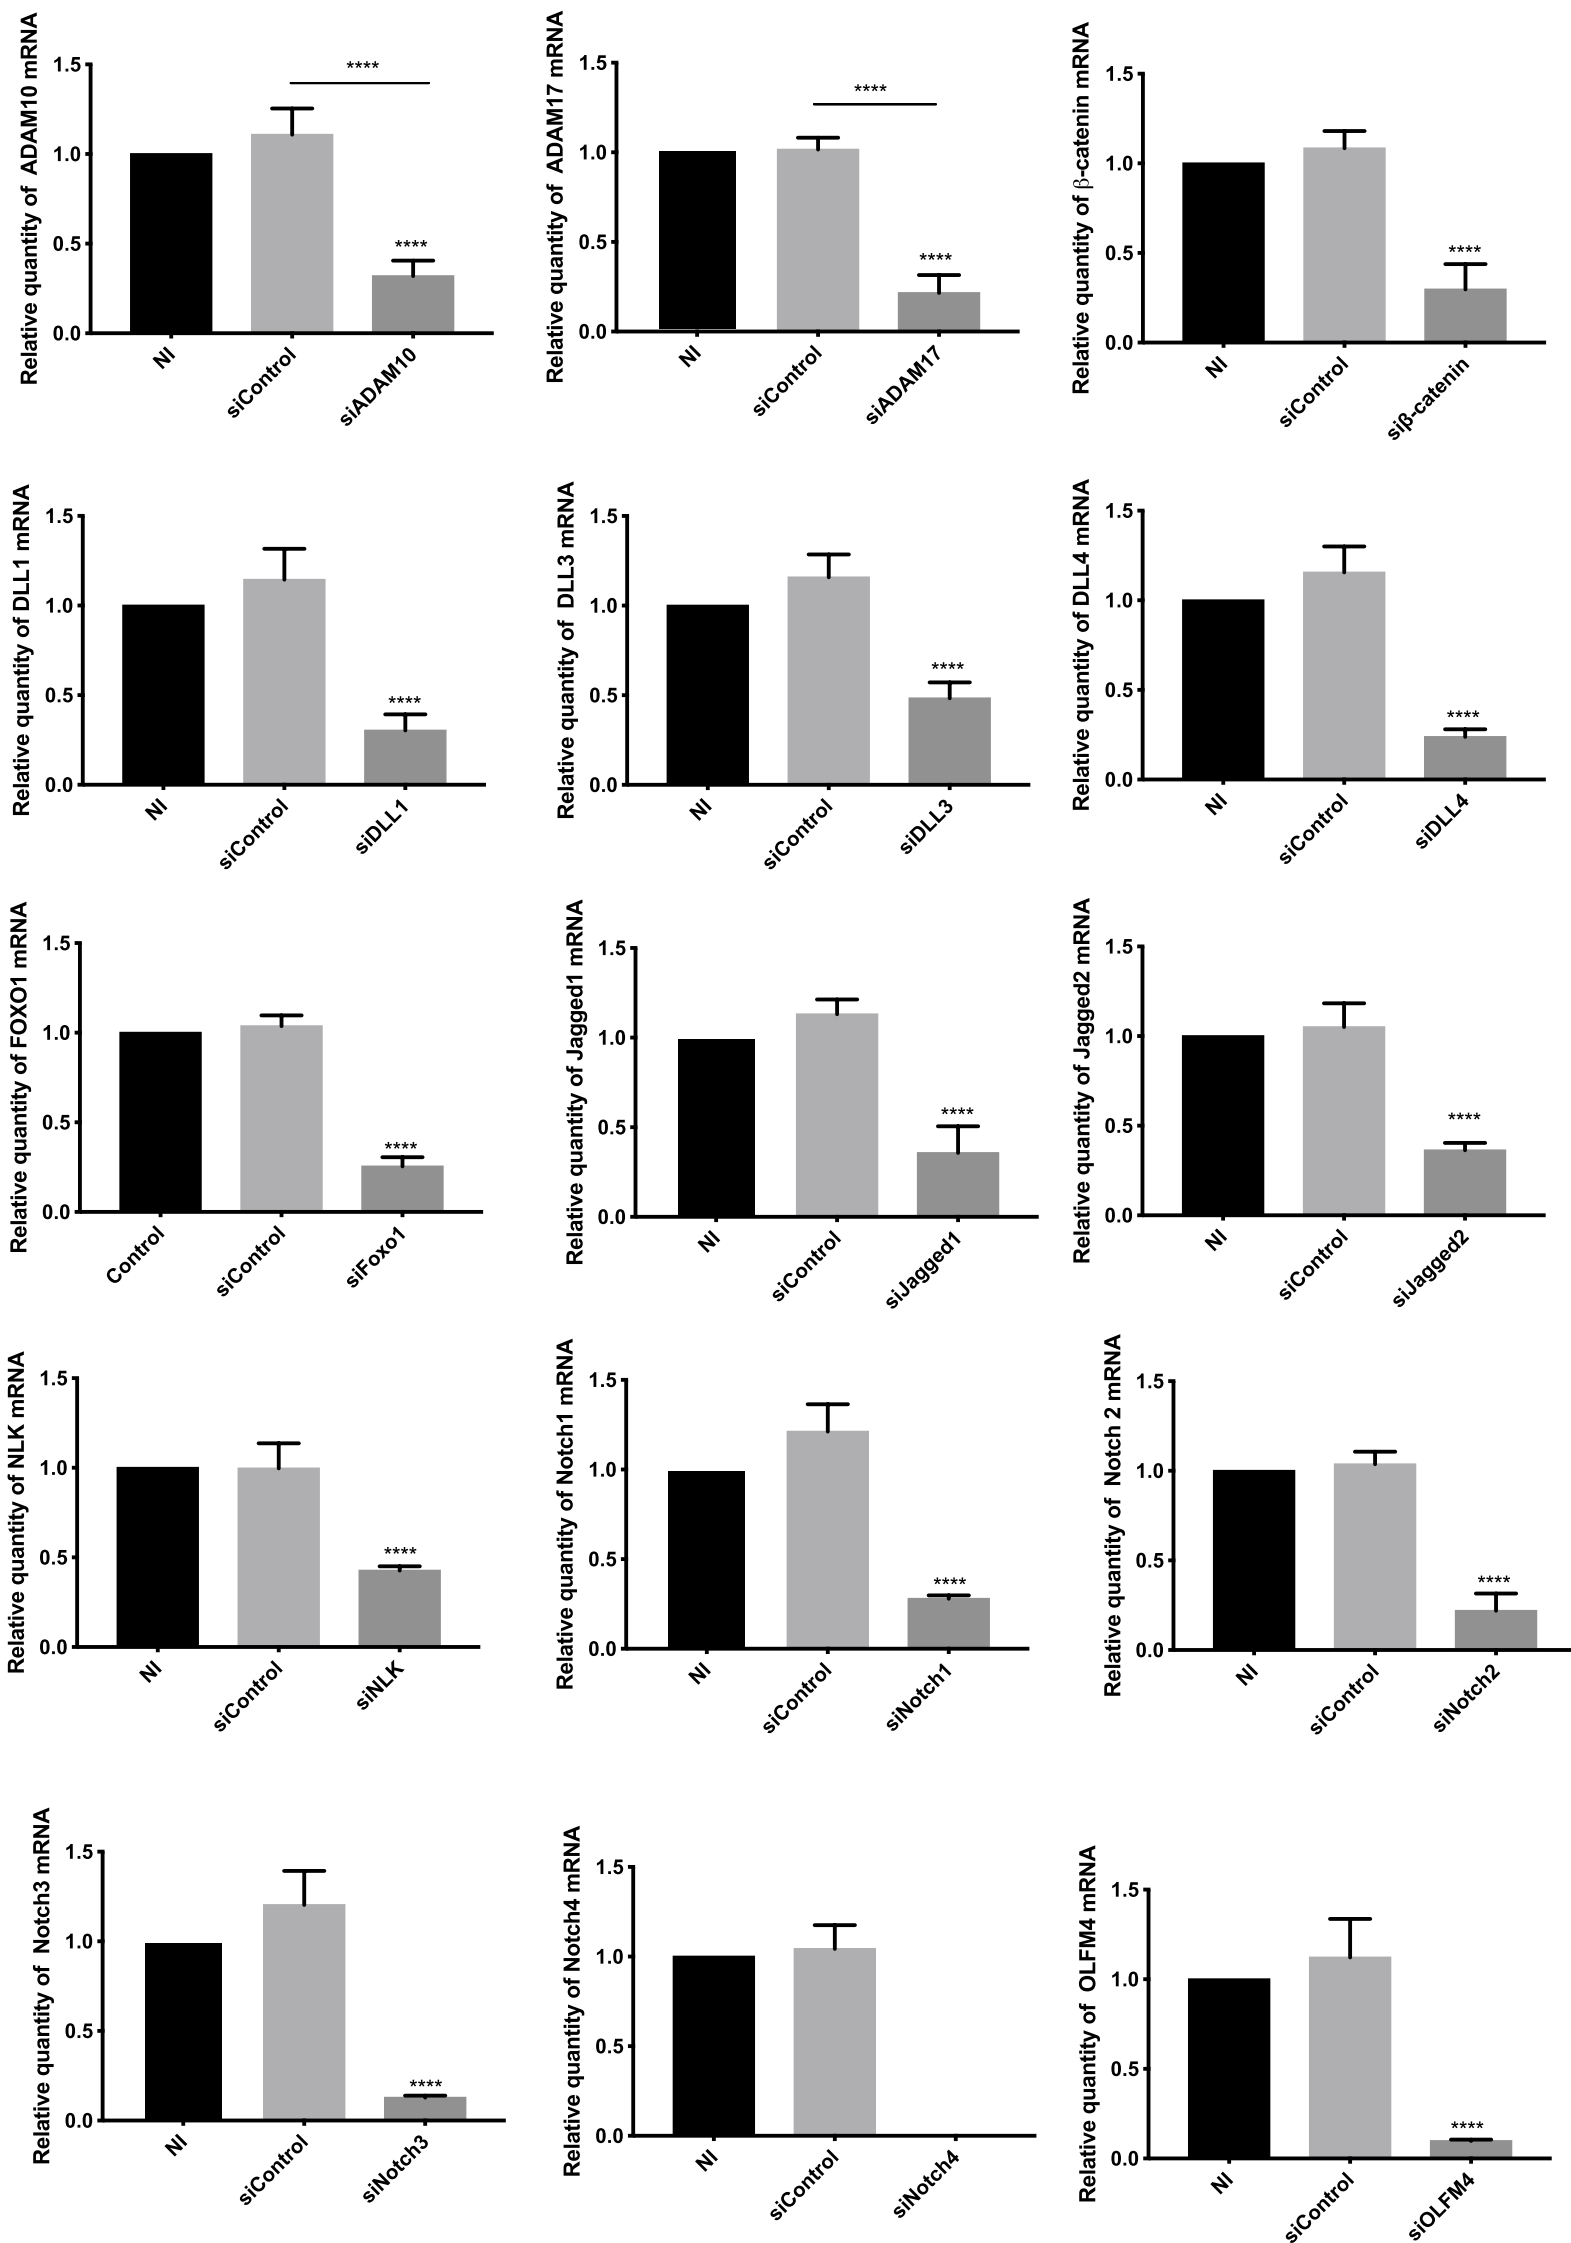

Figure S1

A

PCA

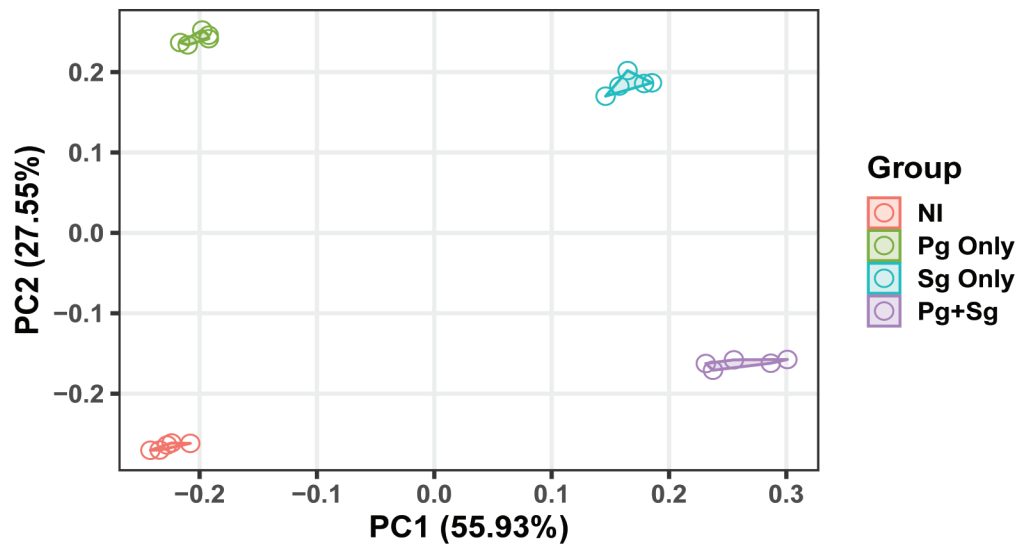

B

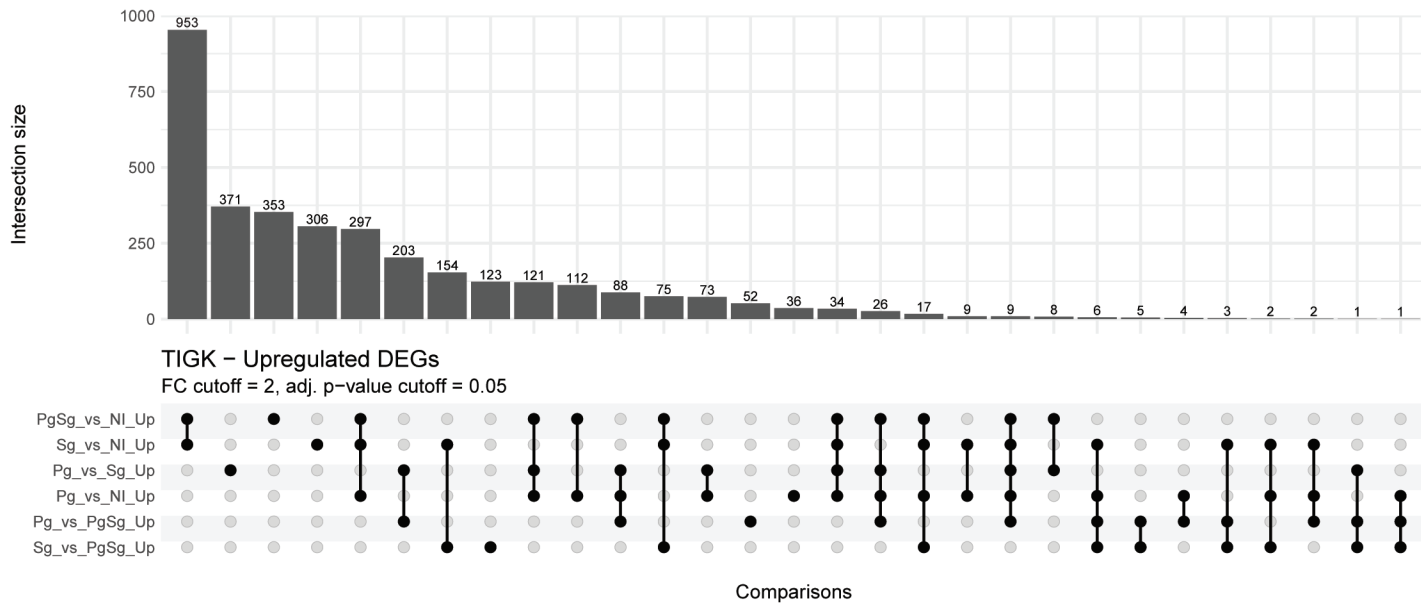

C

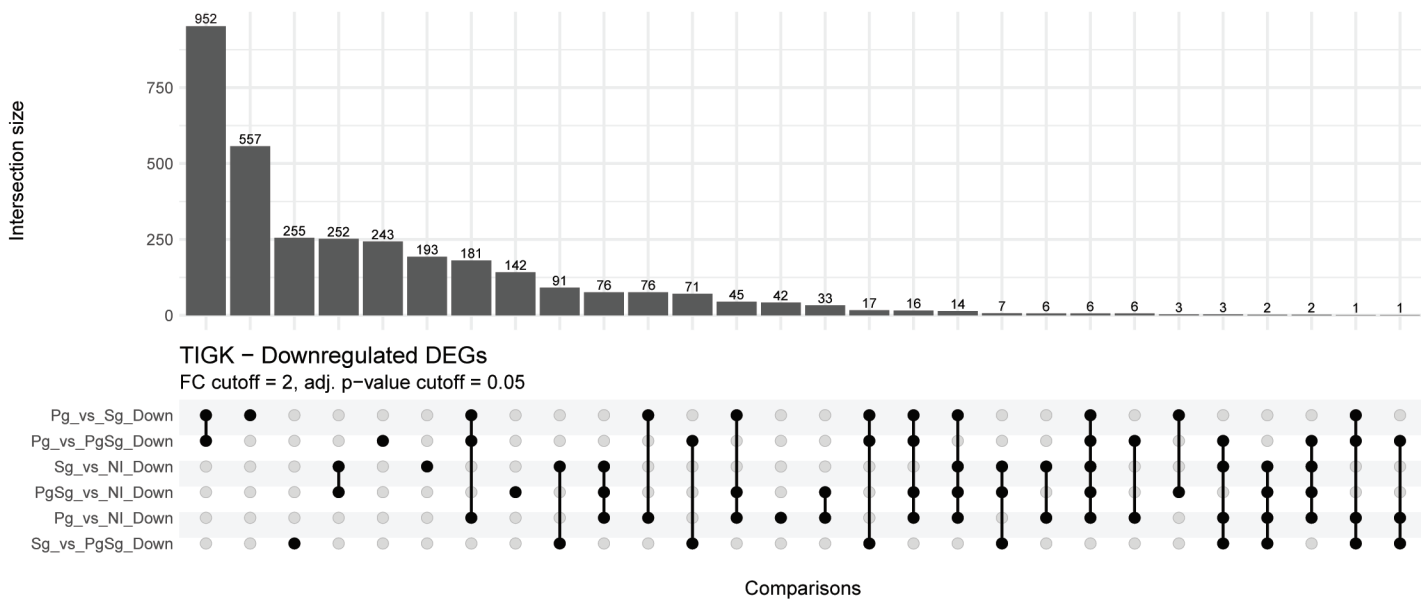

D

**Pg vs. NI**Log<sub>2</sub>FC cutoff = 1, adj. p-value cutoff = 0.05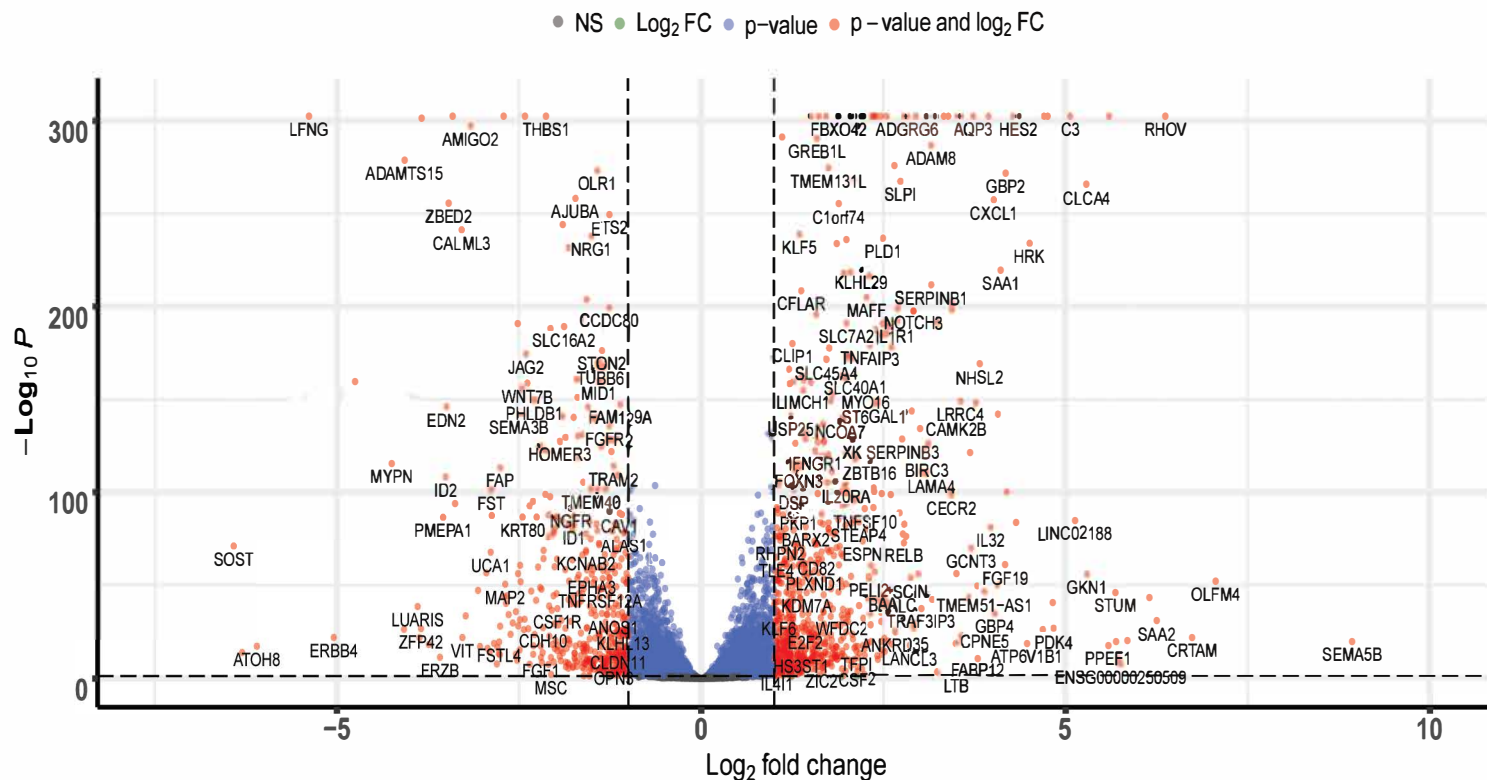

E

**Pg+Sg vs Pg**Log<sub>2</sub>FC cutoff = 1, adj. p-value cutoff = 0.05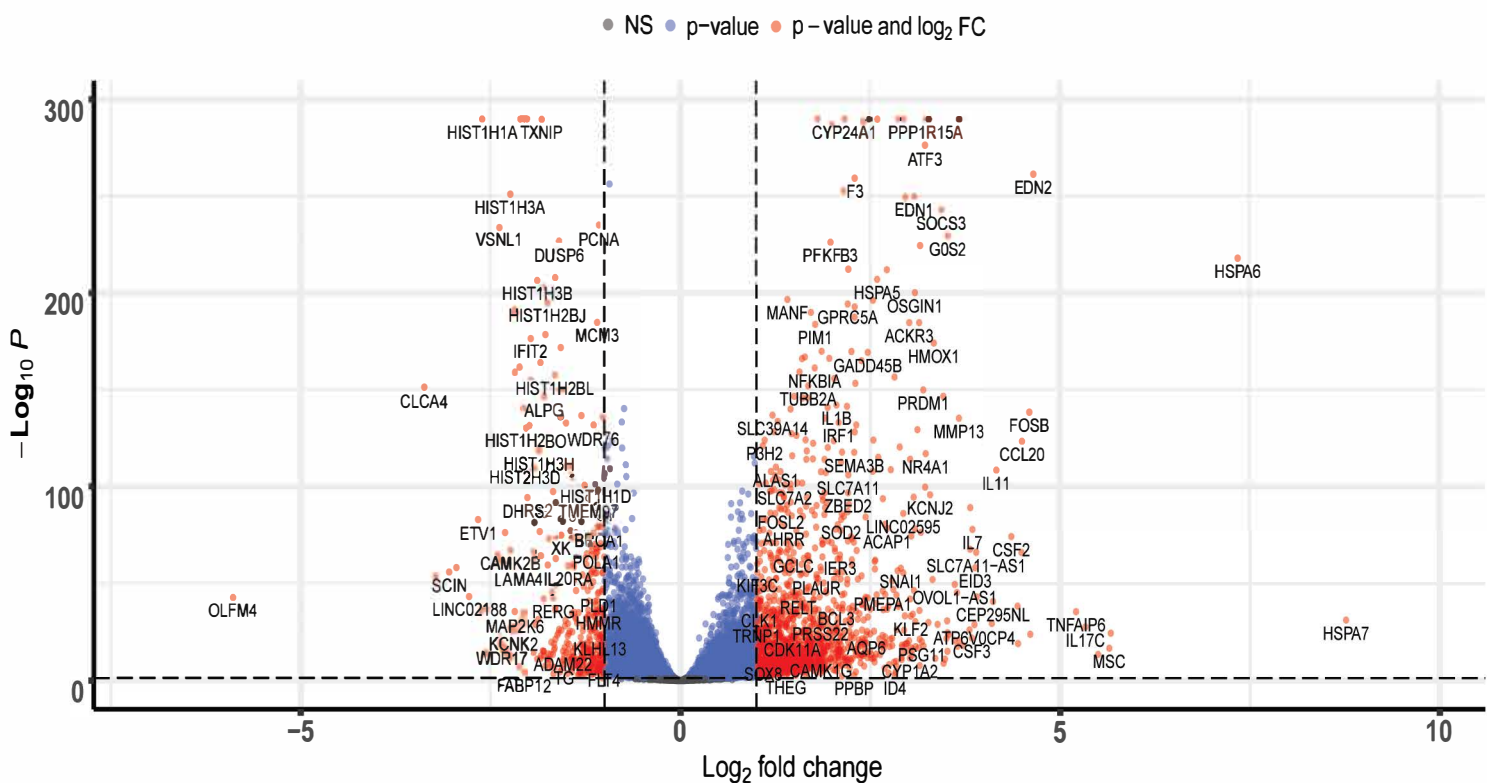

F

## Pg+Sg vs Sg

Log<sub>2</sub>FC cutoff = 1, adj. p-value cutoff = 0.05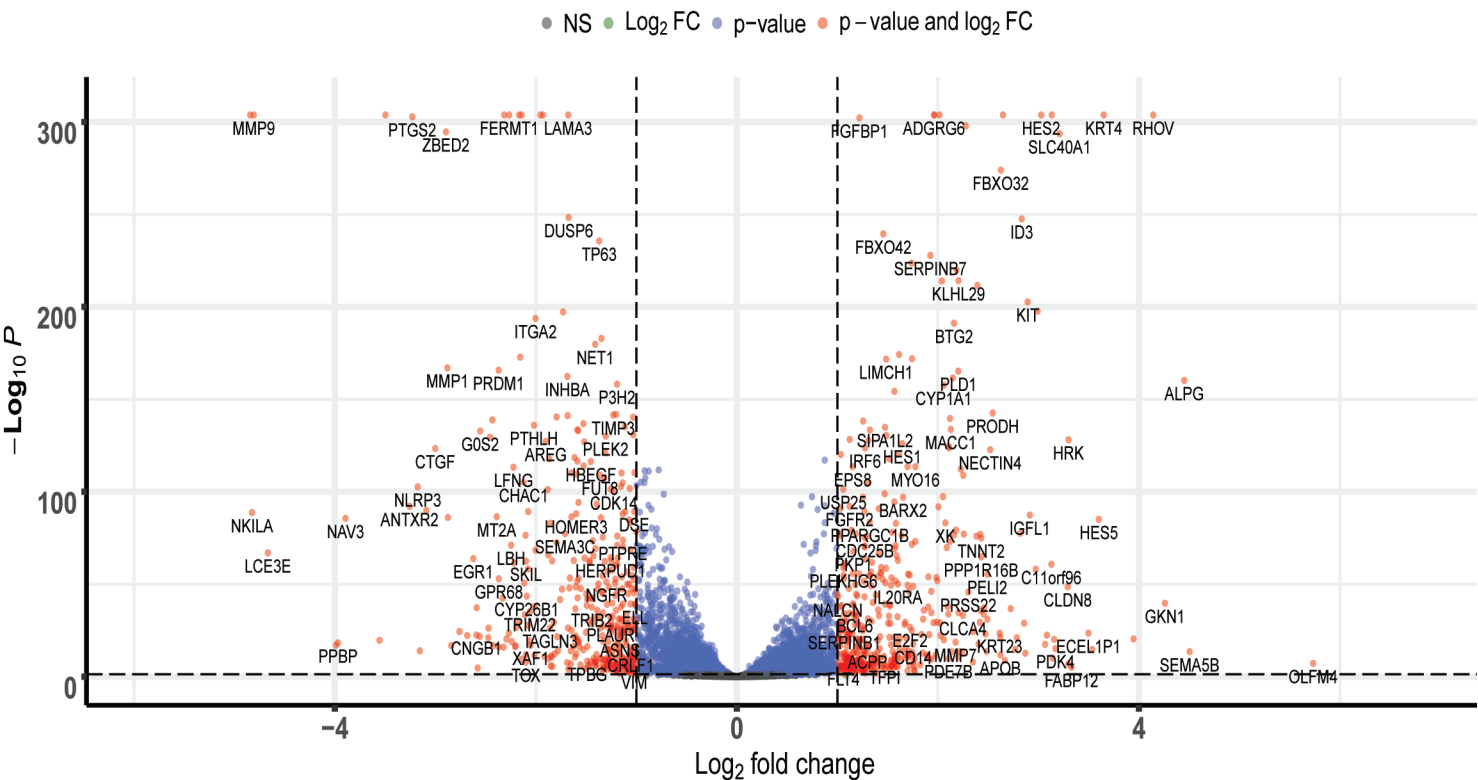

G

## Pg vs Sg

Log<sub>2</sub>FC cutoff = 1, adj. p-value cutoff = 0.05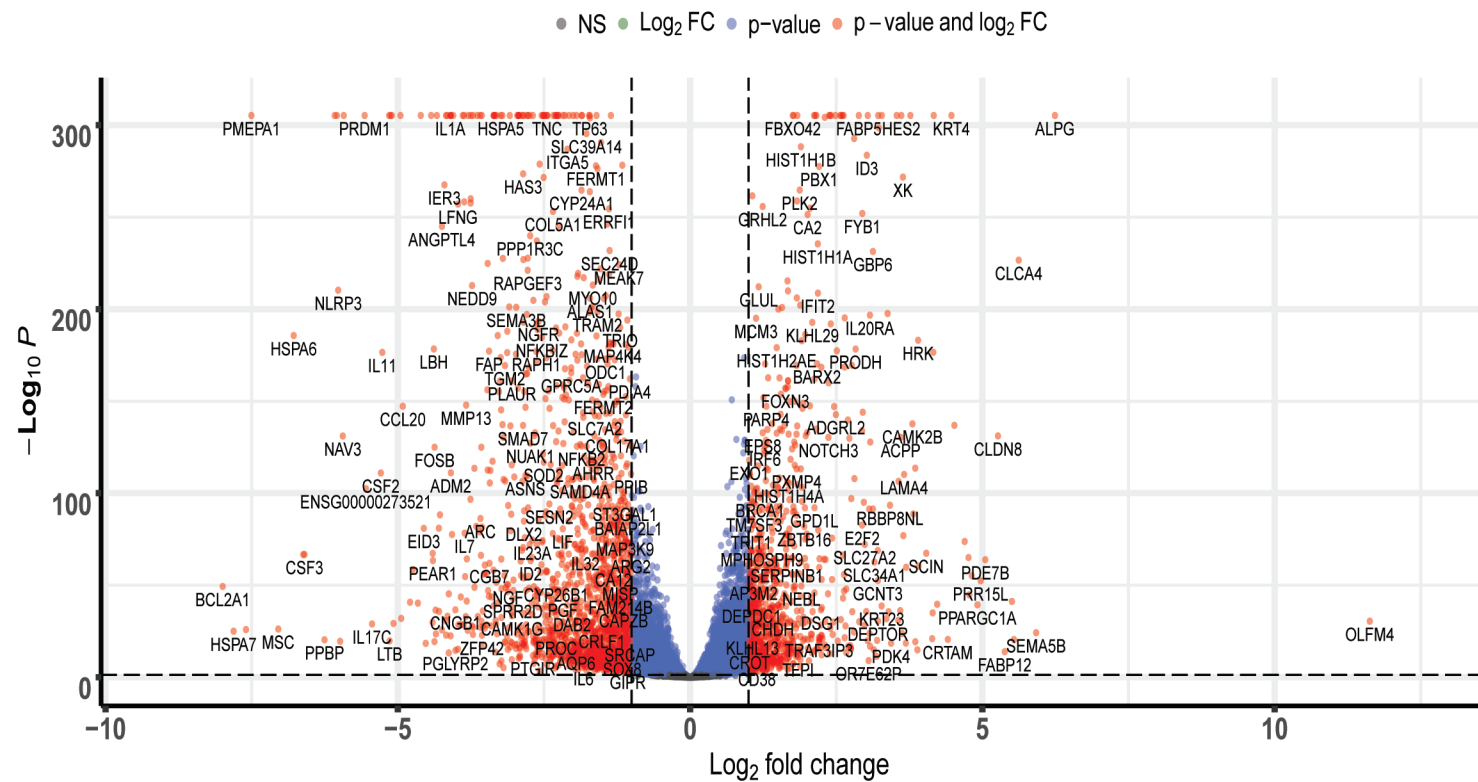

Figure S2

Total = 14607 input genes

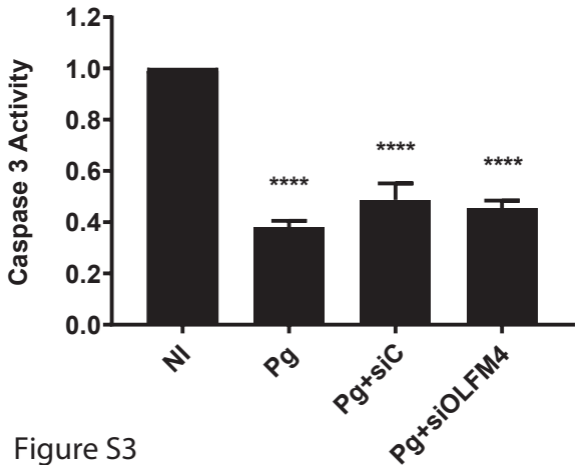

Figure S3



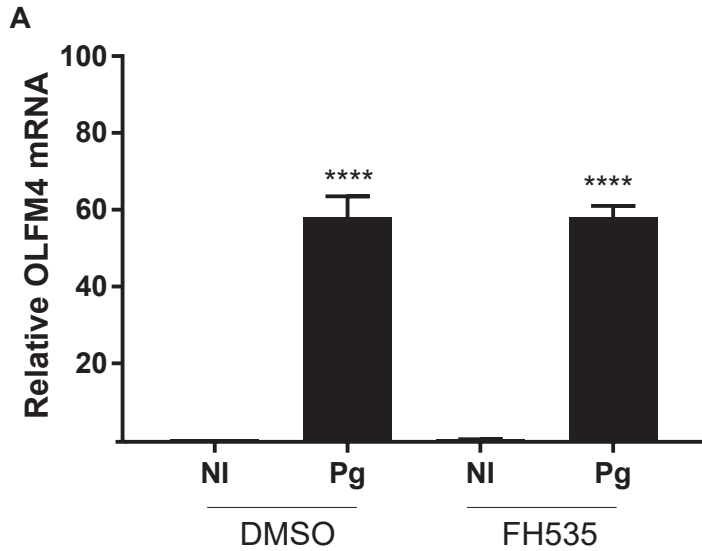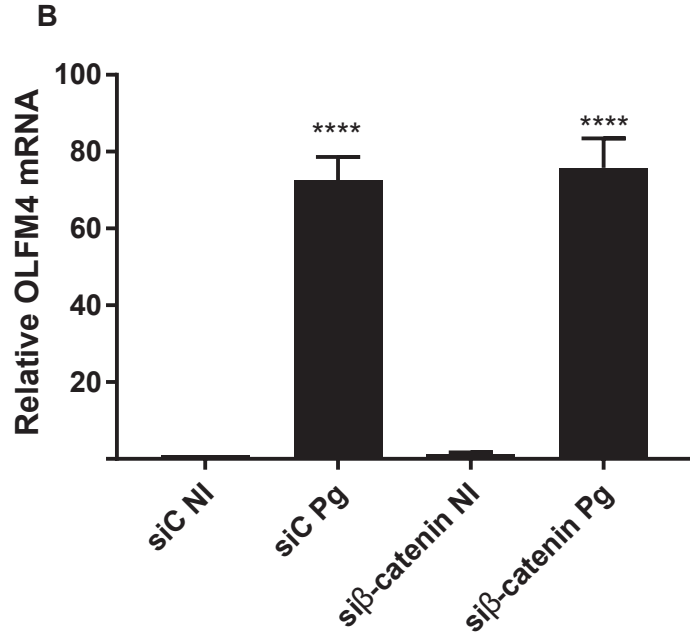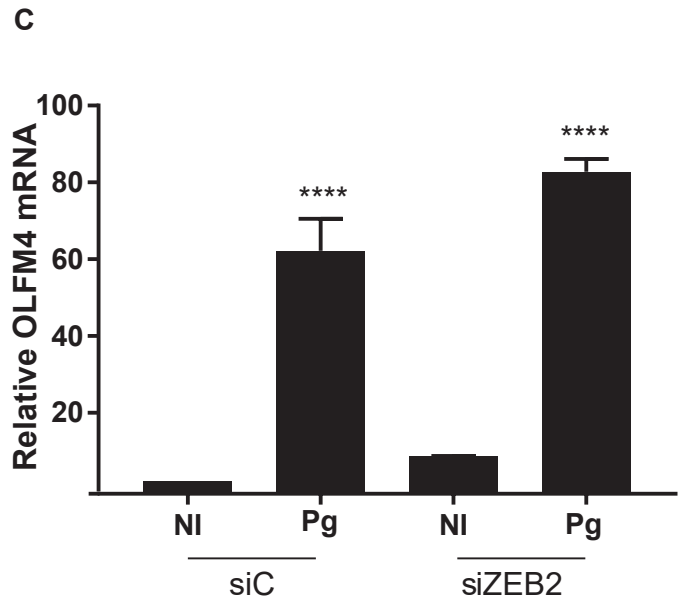

Figure S4

A

## PCA

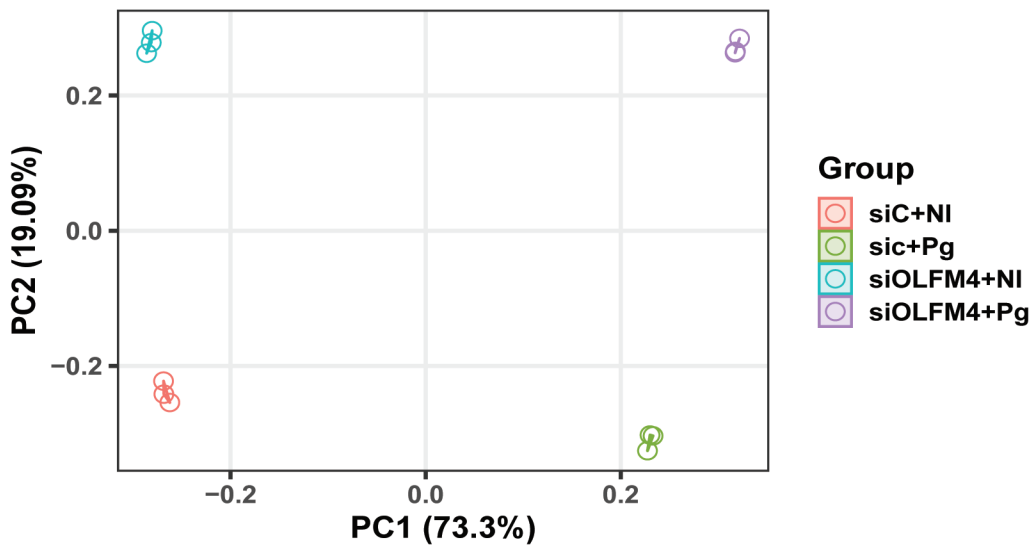

B

## siOLFM4+Pg vs. siC+Pg

Log<sub>2</sub>FC cutoff = 1, adj. p-value cutoff = 0.05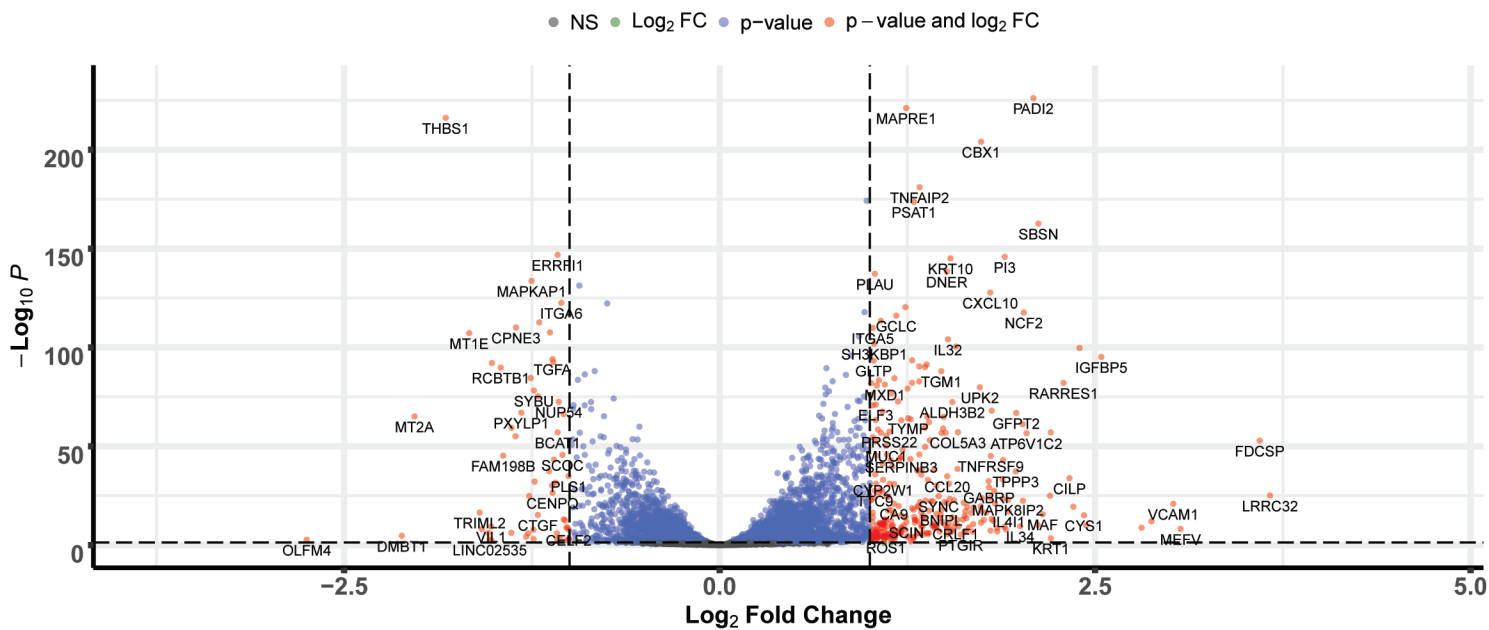

C

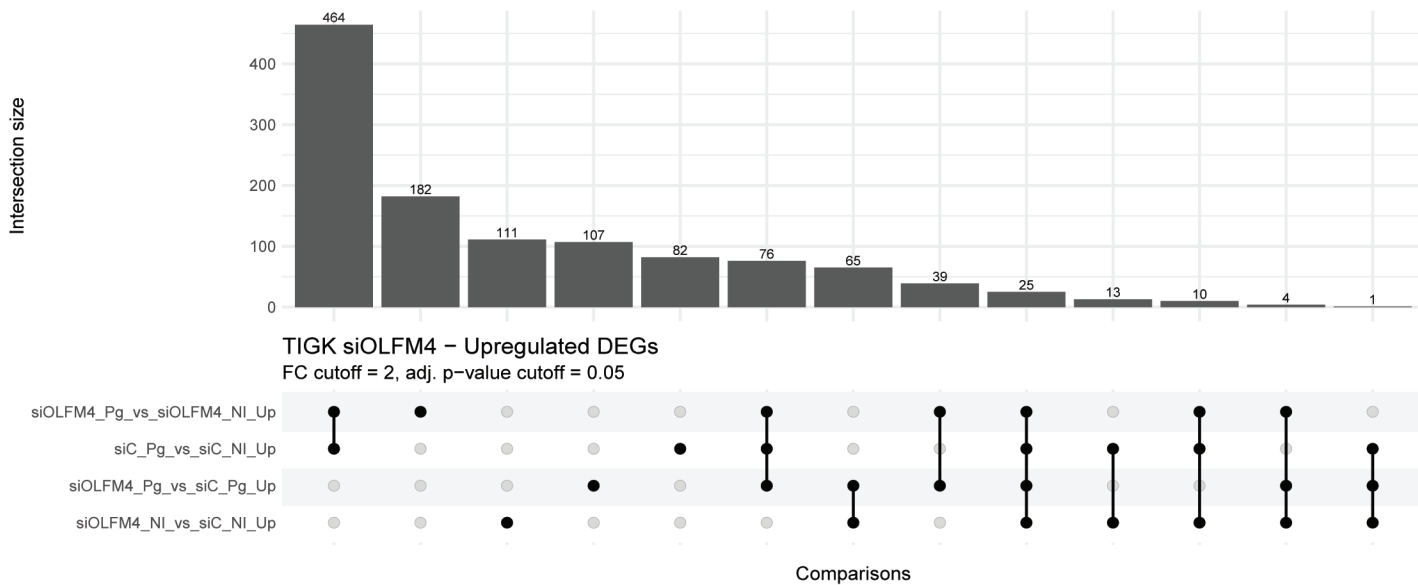

D

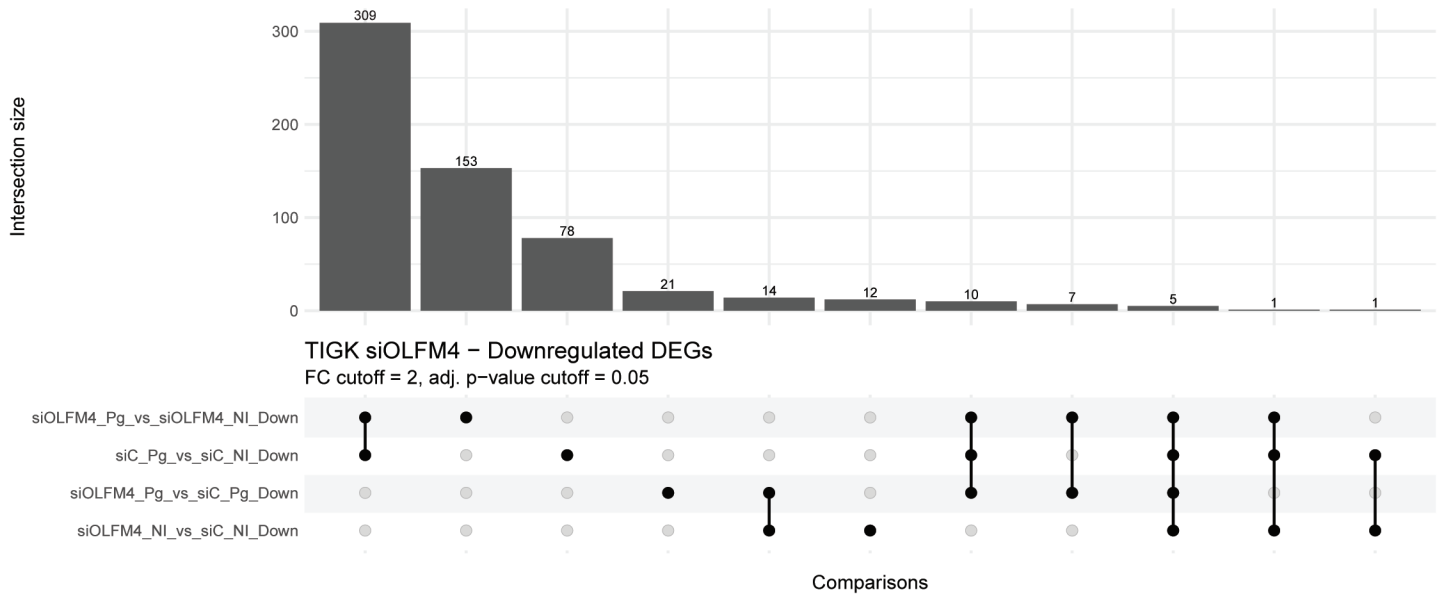

Figure S5

## Supplementary Figure Legends

**Figure S1.** Confirmation of siRNA knockdown of target genes as indicated by qRT-PCR. \*\*\*\* $p < 0.001$  compared to siControl.

**Figure S2. Transcriptomic responses of TIGKs to challenge with *P. gingivalis* and *S. gordonii*.** TIGK cells were challenged with *P. gingivalis* (Pg) MOI 100, *S. gordonii* (Sg) MOI 100, Pg MOI 50 in combination with Sg MOI 50, or noninfected (NI). A) Principal Component Analysis (PCA) of RNA-Seq. Each biological replicate for infected and noninfected (NI) is shown on the first two components of the principal component analysis. B-C) UpSet charts of differentially expressed genes (DEGs) in common amongst treatment groups using the ComplexUpSet R package. D-G) Volcano plots of differentially expressed transcripts amongst treatment groups. X-axis shows log-fold change between the two conditions with positive values showing upregulation and negative values showing downregulation. Y-axis denotes  $p$  values for corresponding genes. Significantly differentially expressed genes are shown in red ( $p < 0.05$ , log<sub>2</sub> fold change  $> 1$ ), as determined using the DESeq package in R.

**Figure S3. Suppression of apoptosis in TIGKs by *P. gingivalis* is independent of OLFM4.** TIGKs were transiently transfected with siRNA to OLFM4 or scrambled siRNA (siC), challenged with *P. gingivalis* (Pg), and apoptosis induced with camptothecin. Caspase 3 activity is presented relative to uninfected (NI) control. Data are means with SD and representative of 3 biological replicates. \*\*\*\*  $p < 0.001$ .

**Figure S4. Wnt/ $\beta$ -catenin and ZEB2 are not required for activation of OLFM4 by *P. gingivalis*.** qRT-PCR of OLFM4 transcripts. A) TIGKs were pretreated with FH525 or DMSO and challenged with *P. gingivalis* (Pg). B) TIGK cells were transiently transfected with siRNA to  $\beta$ -catenin or scrambled siRNA (siC) and challenged with *P. gingivalis* (Pg). C) TIGK cells were transiently transfected with siRNA to ZEB2 or scrambled siRNA (siC) and challenged with *P. gingivalis* (Pg).

OLFM4 mRNA levels are expressed relative to noninfected (NI) controls. Data are means with SEM. \*\*\*\* $p < 0.001$  compared to uninfected (NI).

**Figure S5. OLFM4 controls TIGK inflammatory responses.** TIGKs were transiently transfected with siRNA to OLFM4 or scrambled siRNA (siC), and challenged with *P. gingivalis* (Pg) or left uninfected (NI). A) PCA plot of RNA-Seq analysis of each group. B) Volcano plots of differentially expressed transcripts dependent on reduction of OLFM4 in the Pg infected group. X-axis shows log-fold change between the two conditions with positive values showing upregulation and negative values showing downregulation. Y-axis denotes  $p$  values for corresponding genes. Significantly differentially expressed genes are shown in red ( $p < 0.05$ , log<sub>2</sub> fold change  $> 1$ ). C- D) UpSet charts of DEGs in common amongst treatment groups.
